# Supplementary material
Source: PubMed Central journal article supplement (PMC7211725)

Figura 1  
suplementaria.  
Población  
global

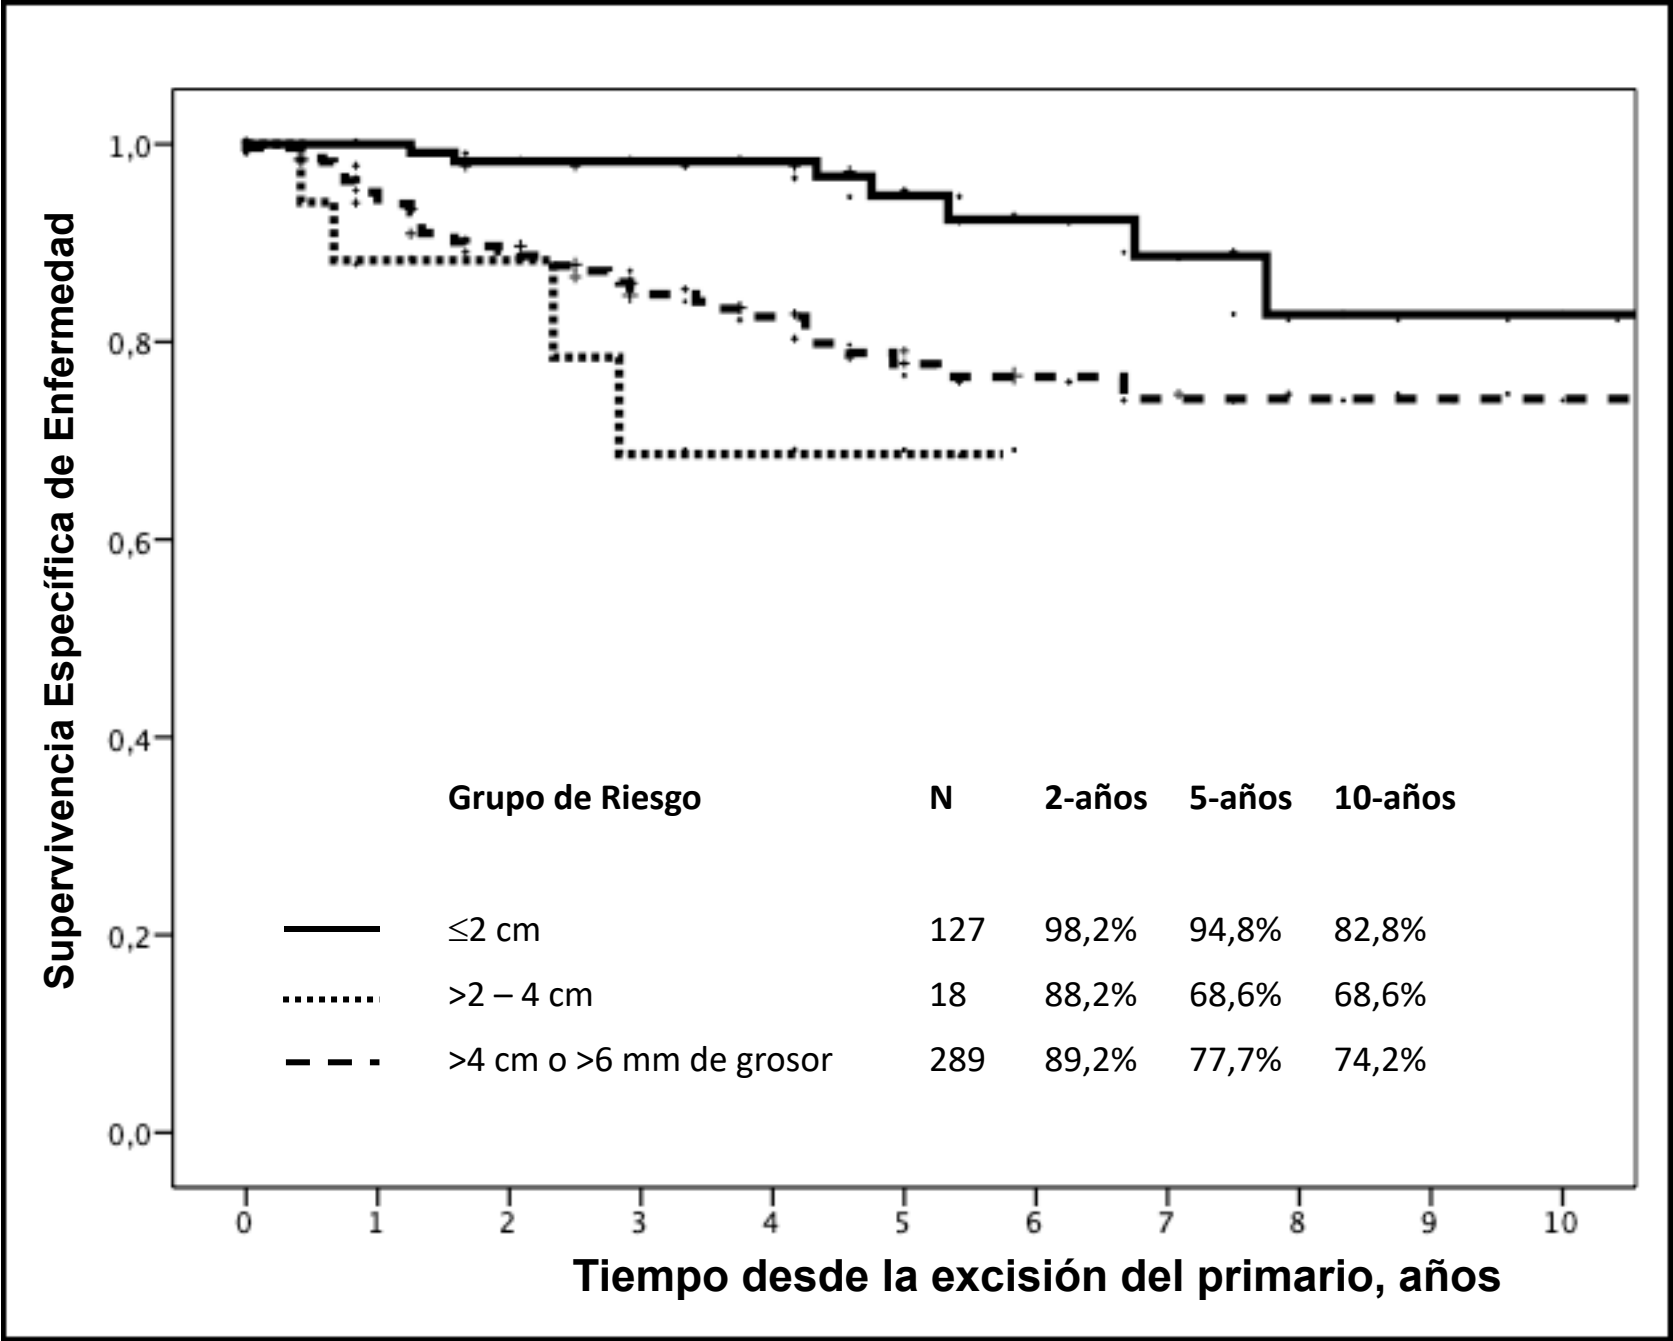

Figura 2  
suplementaria.  
Hombres

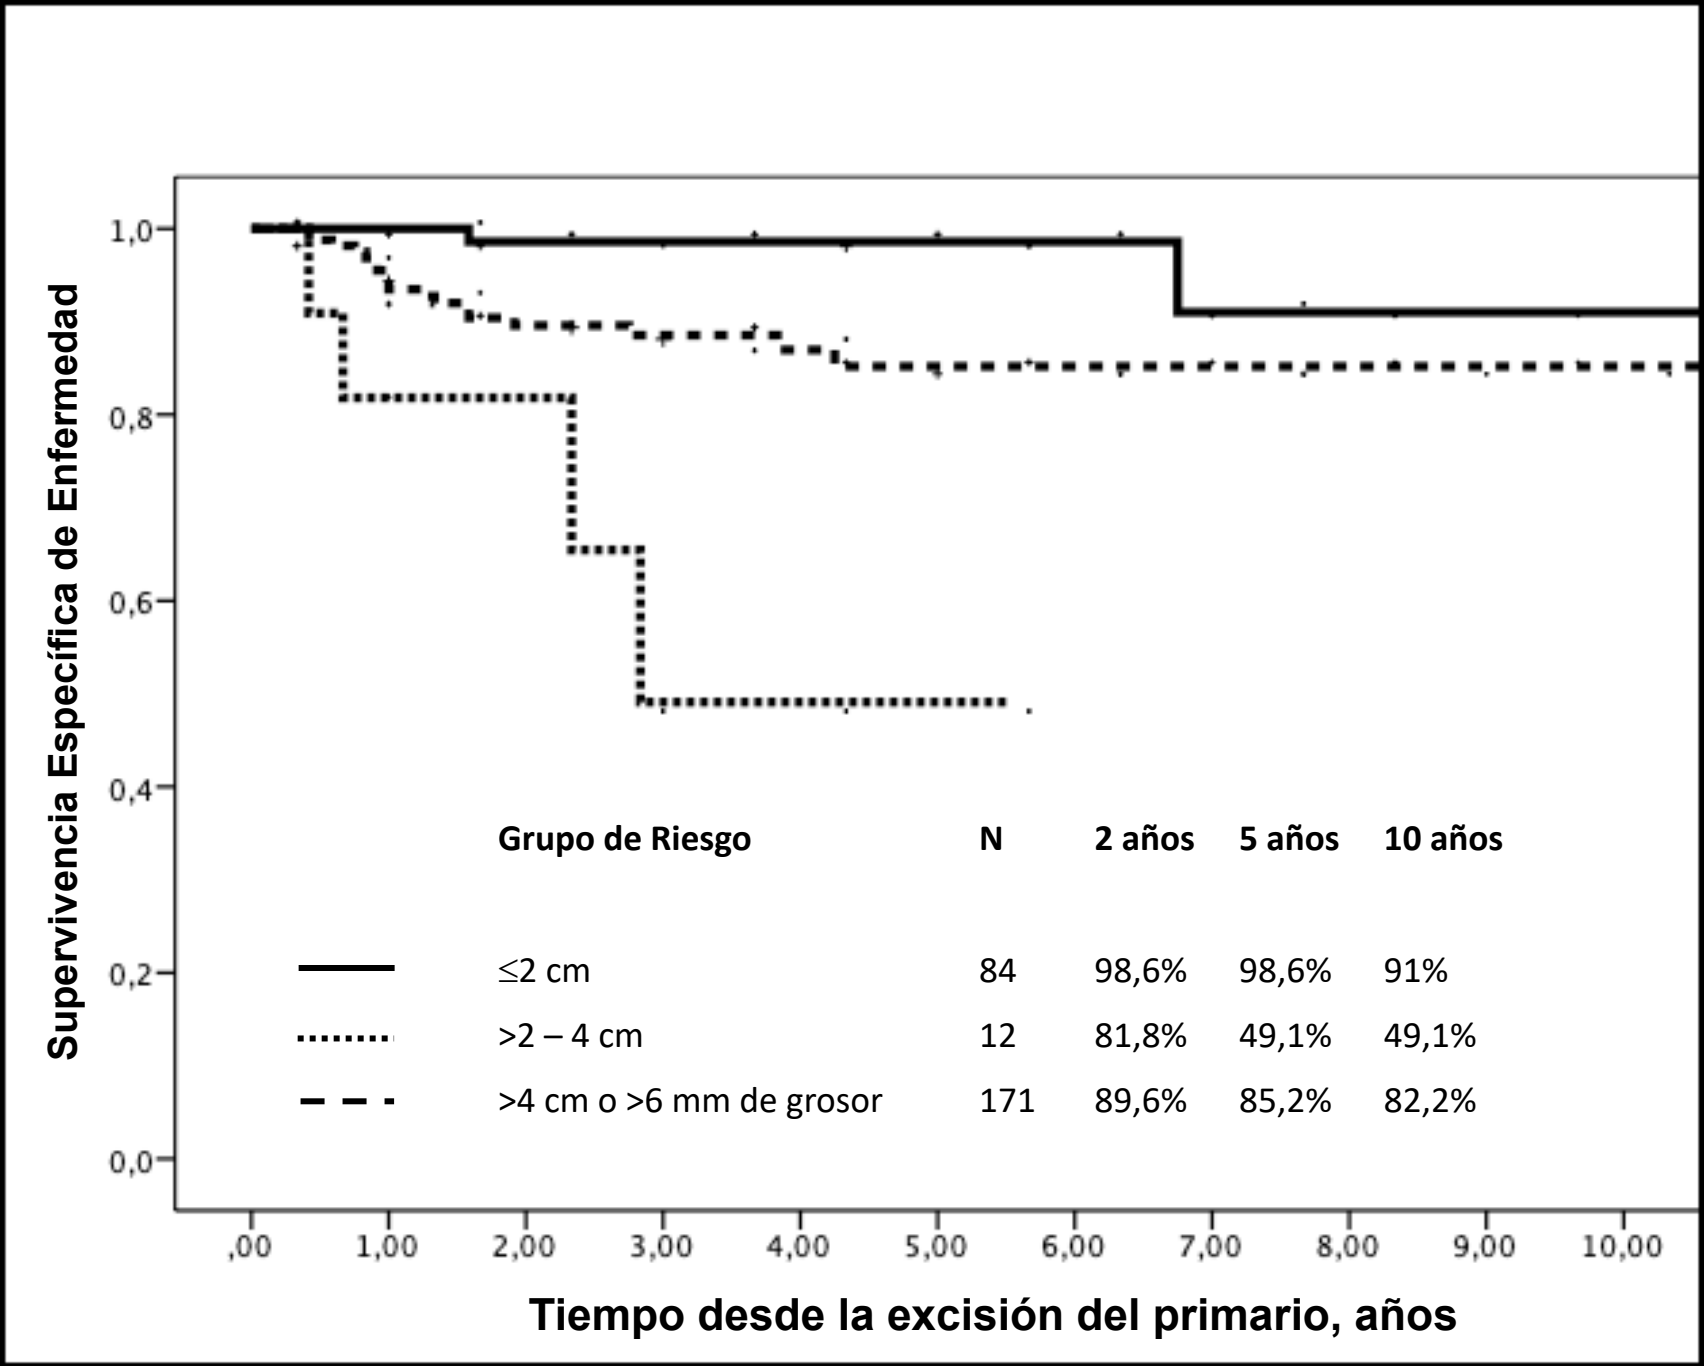

Figura 3  
suplementaria.  
Mujeres

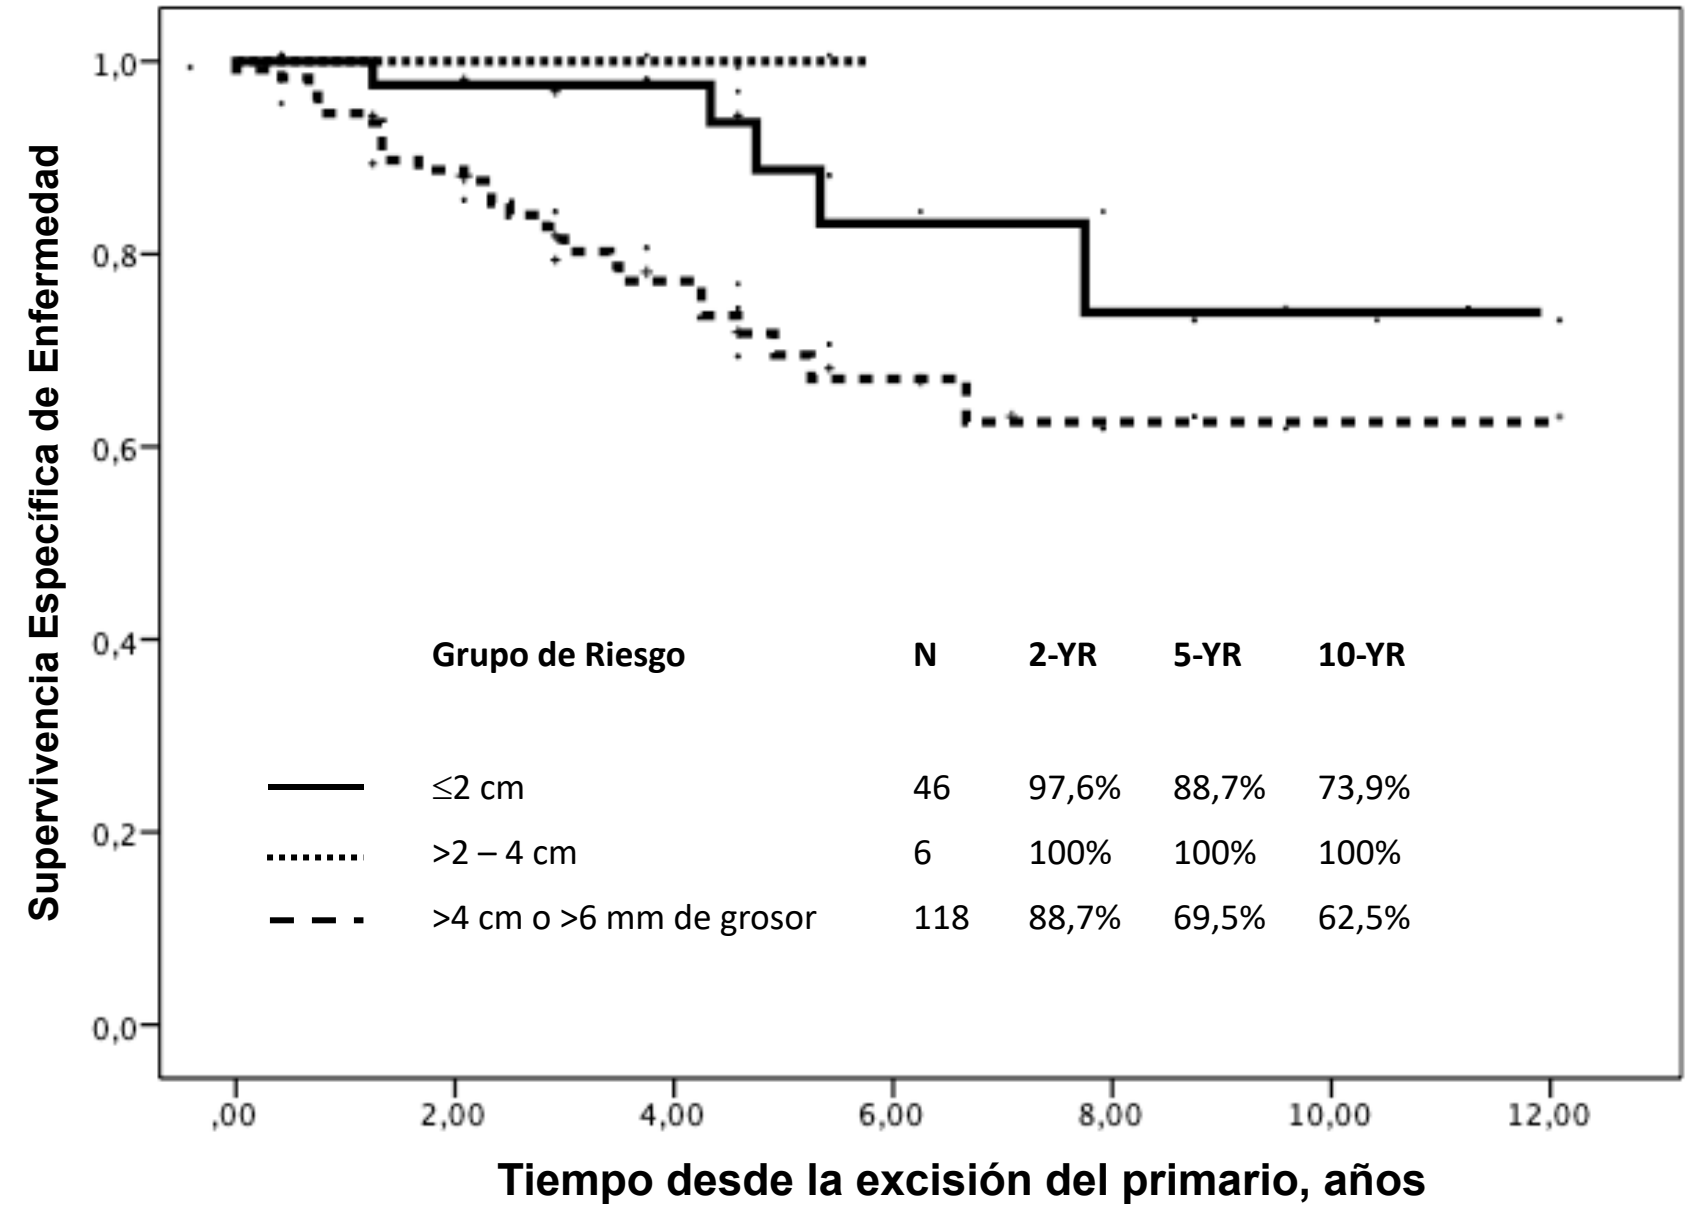

Figura 4  
suplementaria.  
Edad >=80

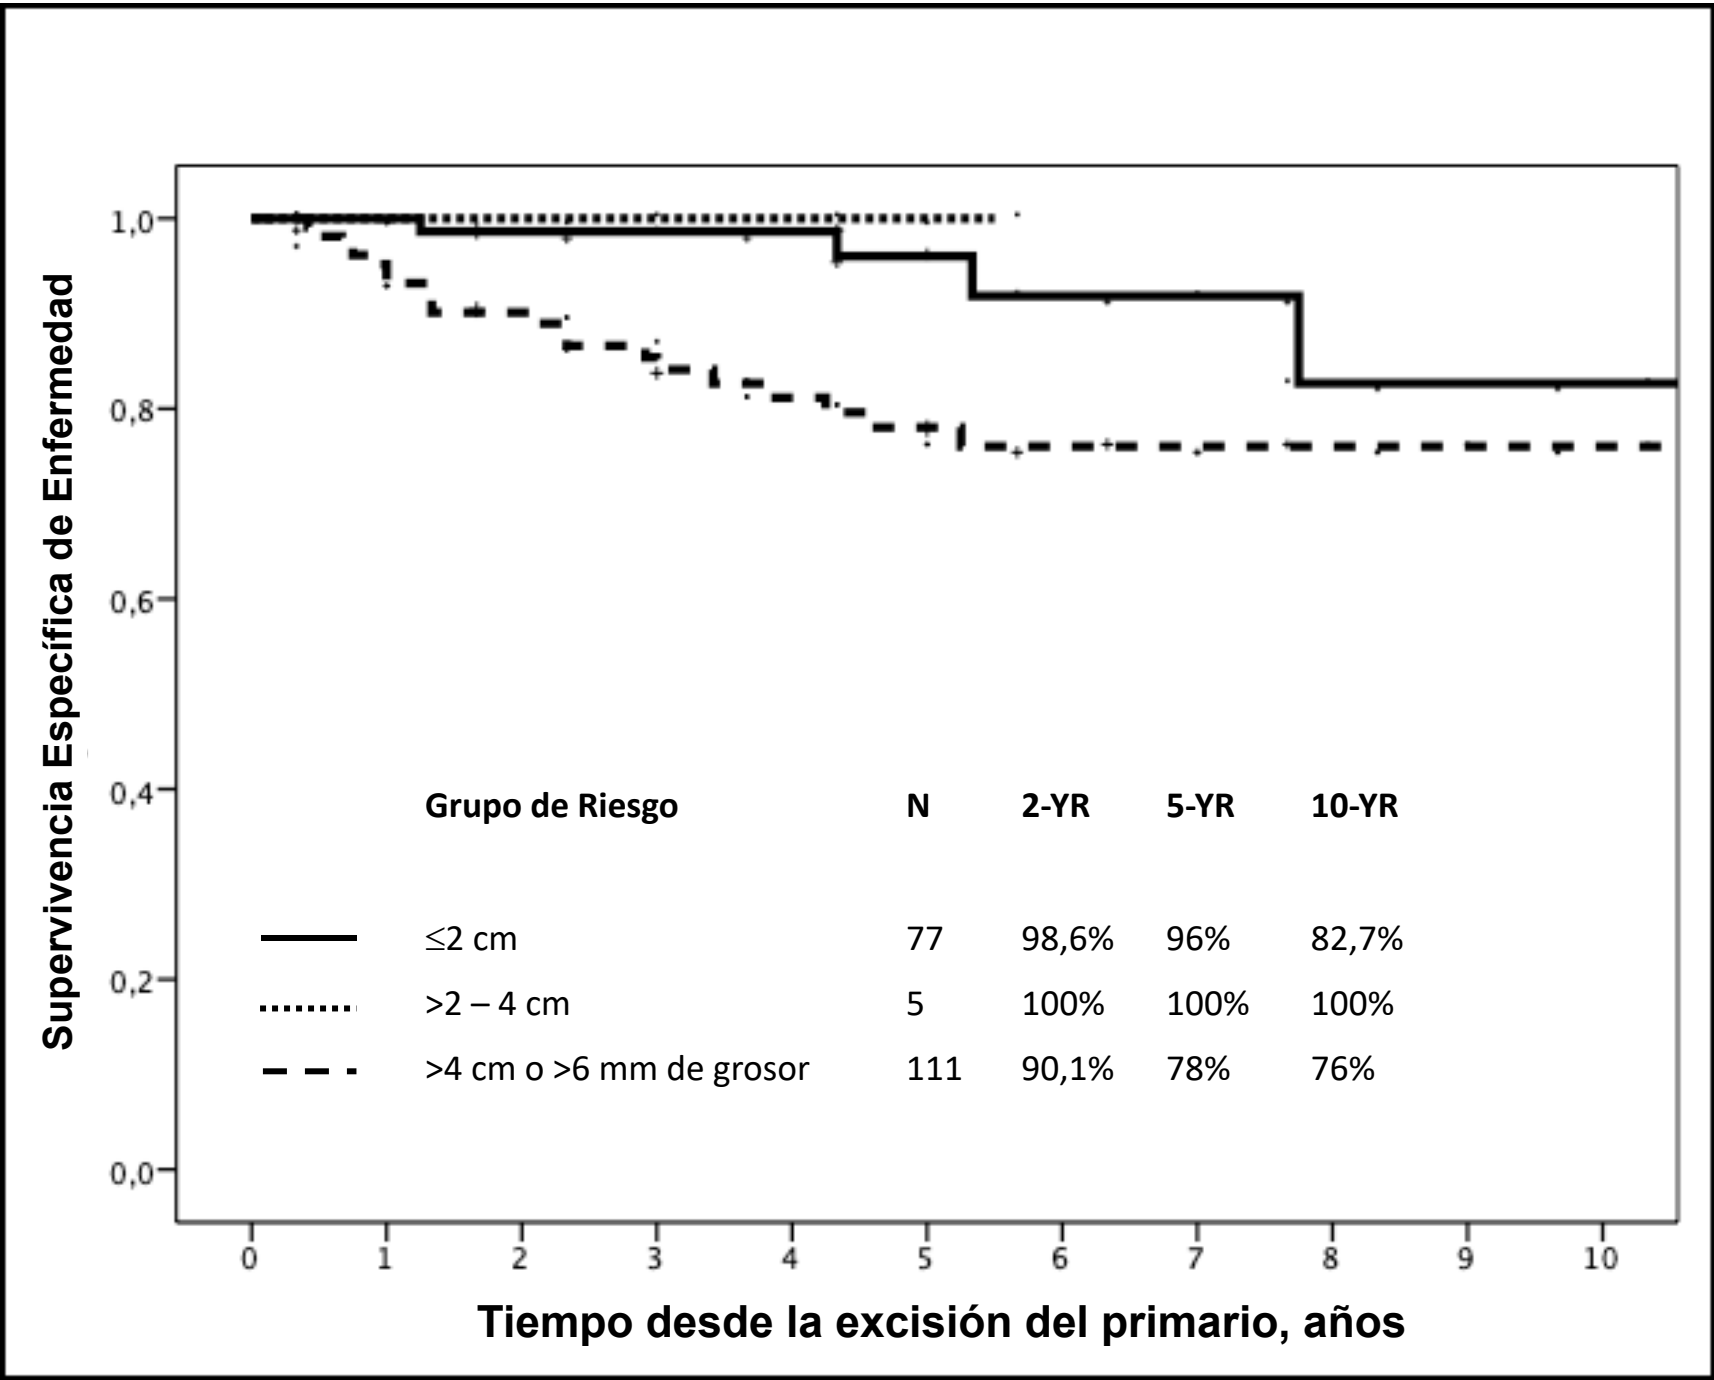

Figura 5  
suplementaria.  
Edad >80

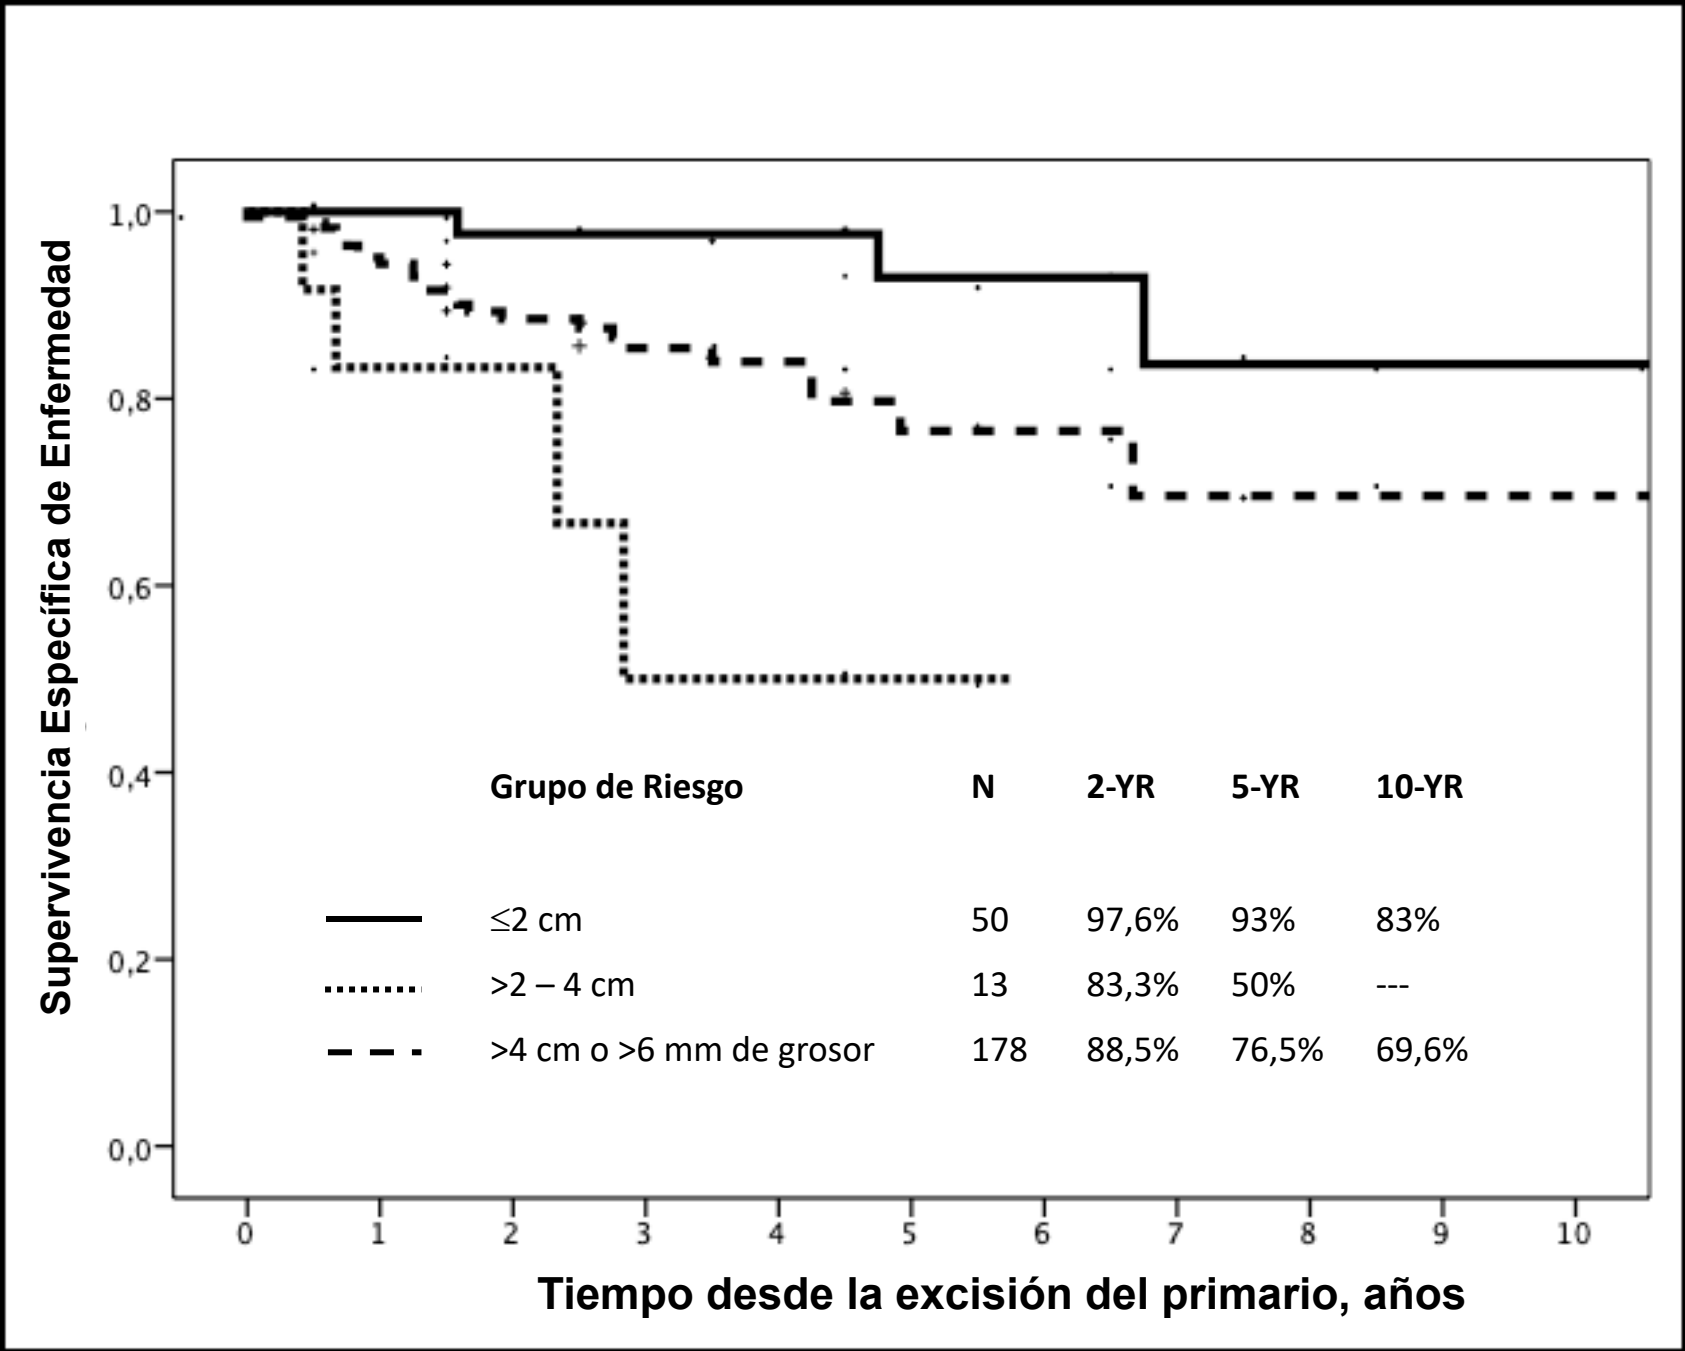

Figura 6  
suplementaria.  
Población global

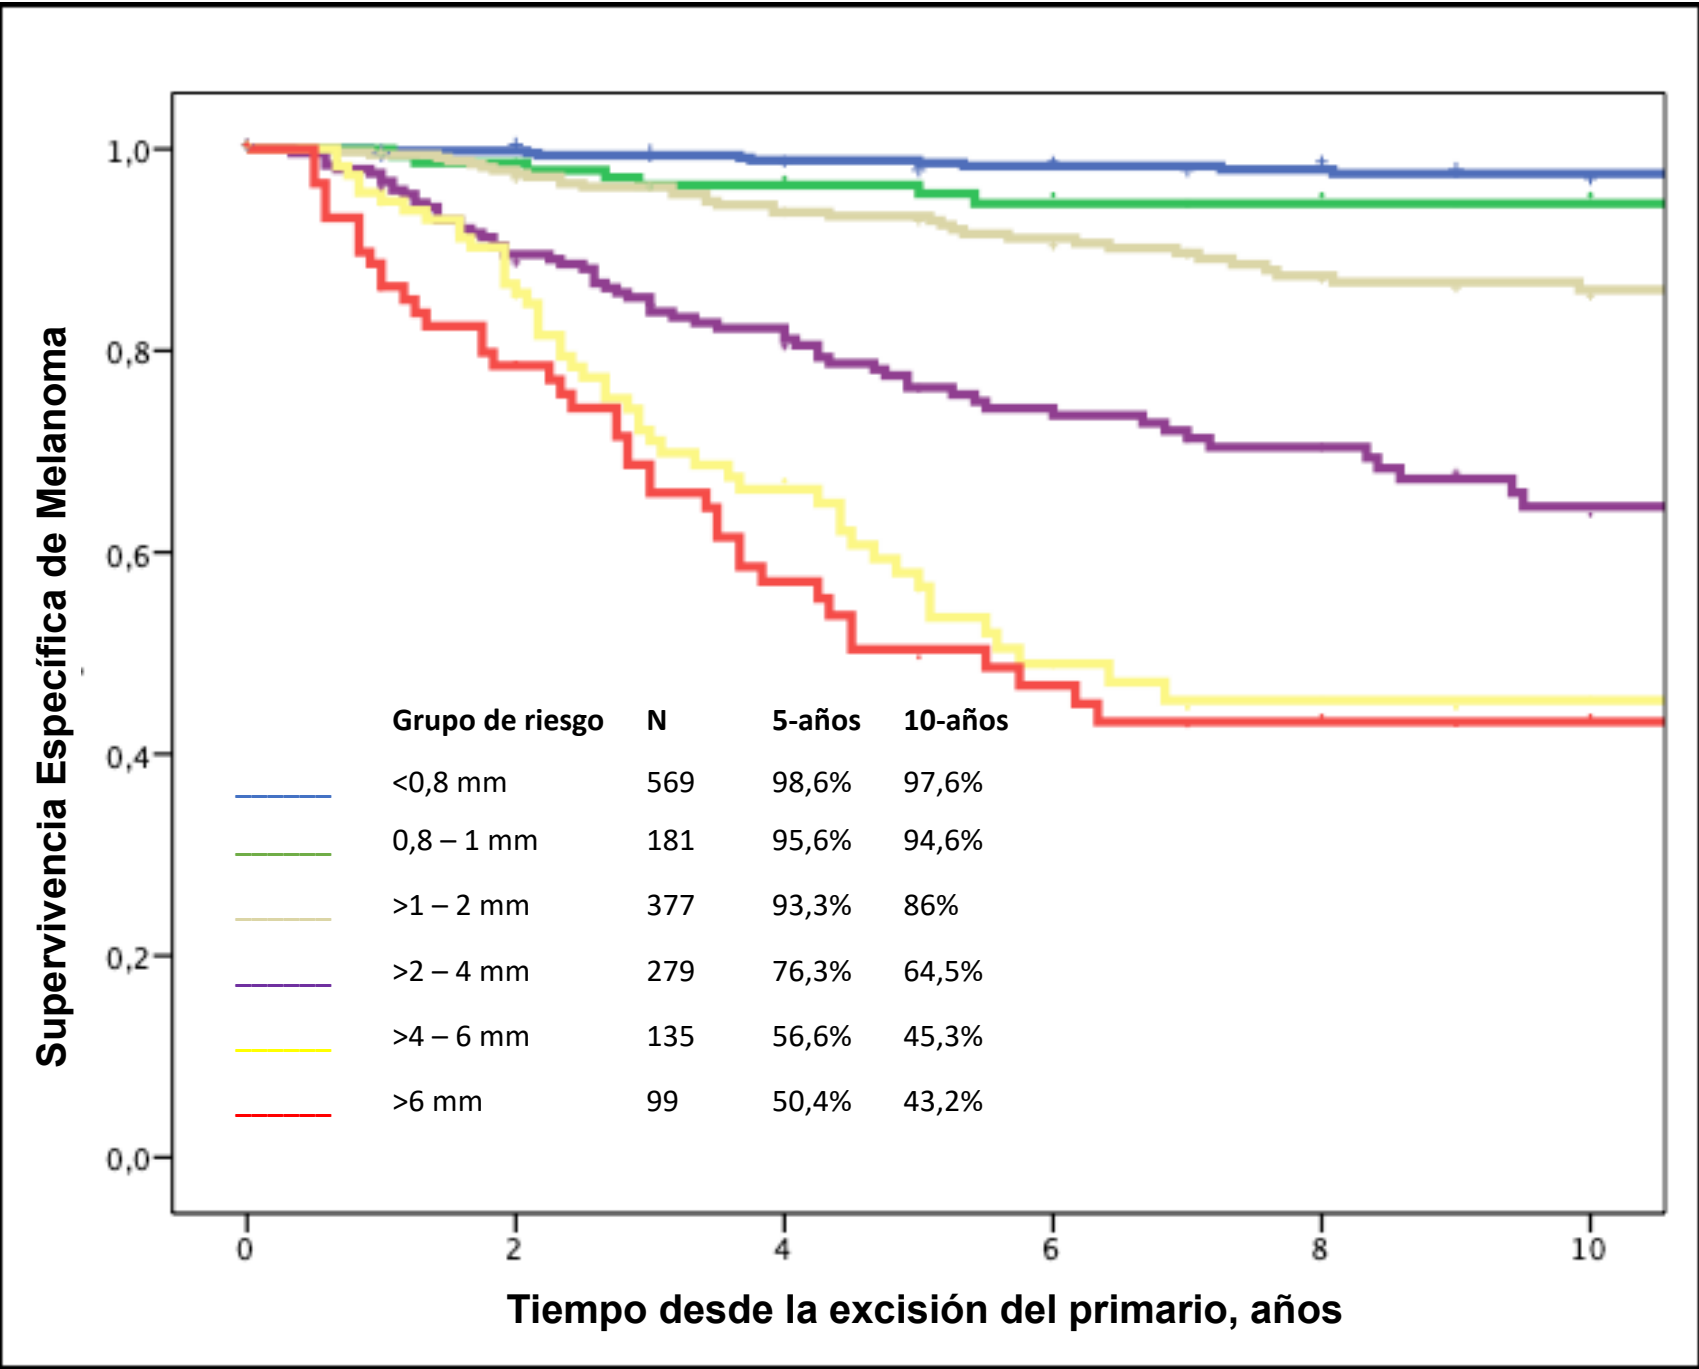

Figura 7 suplementaria.  
Hombres

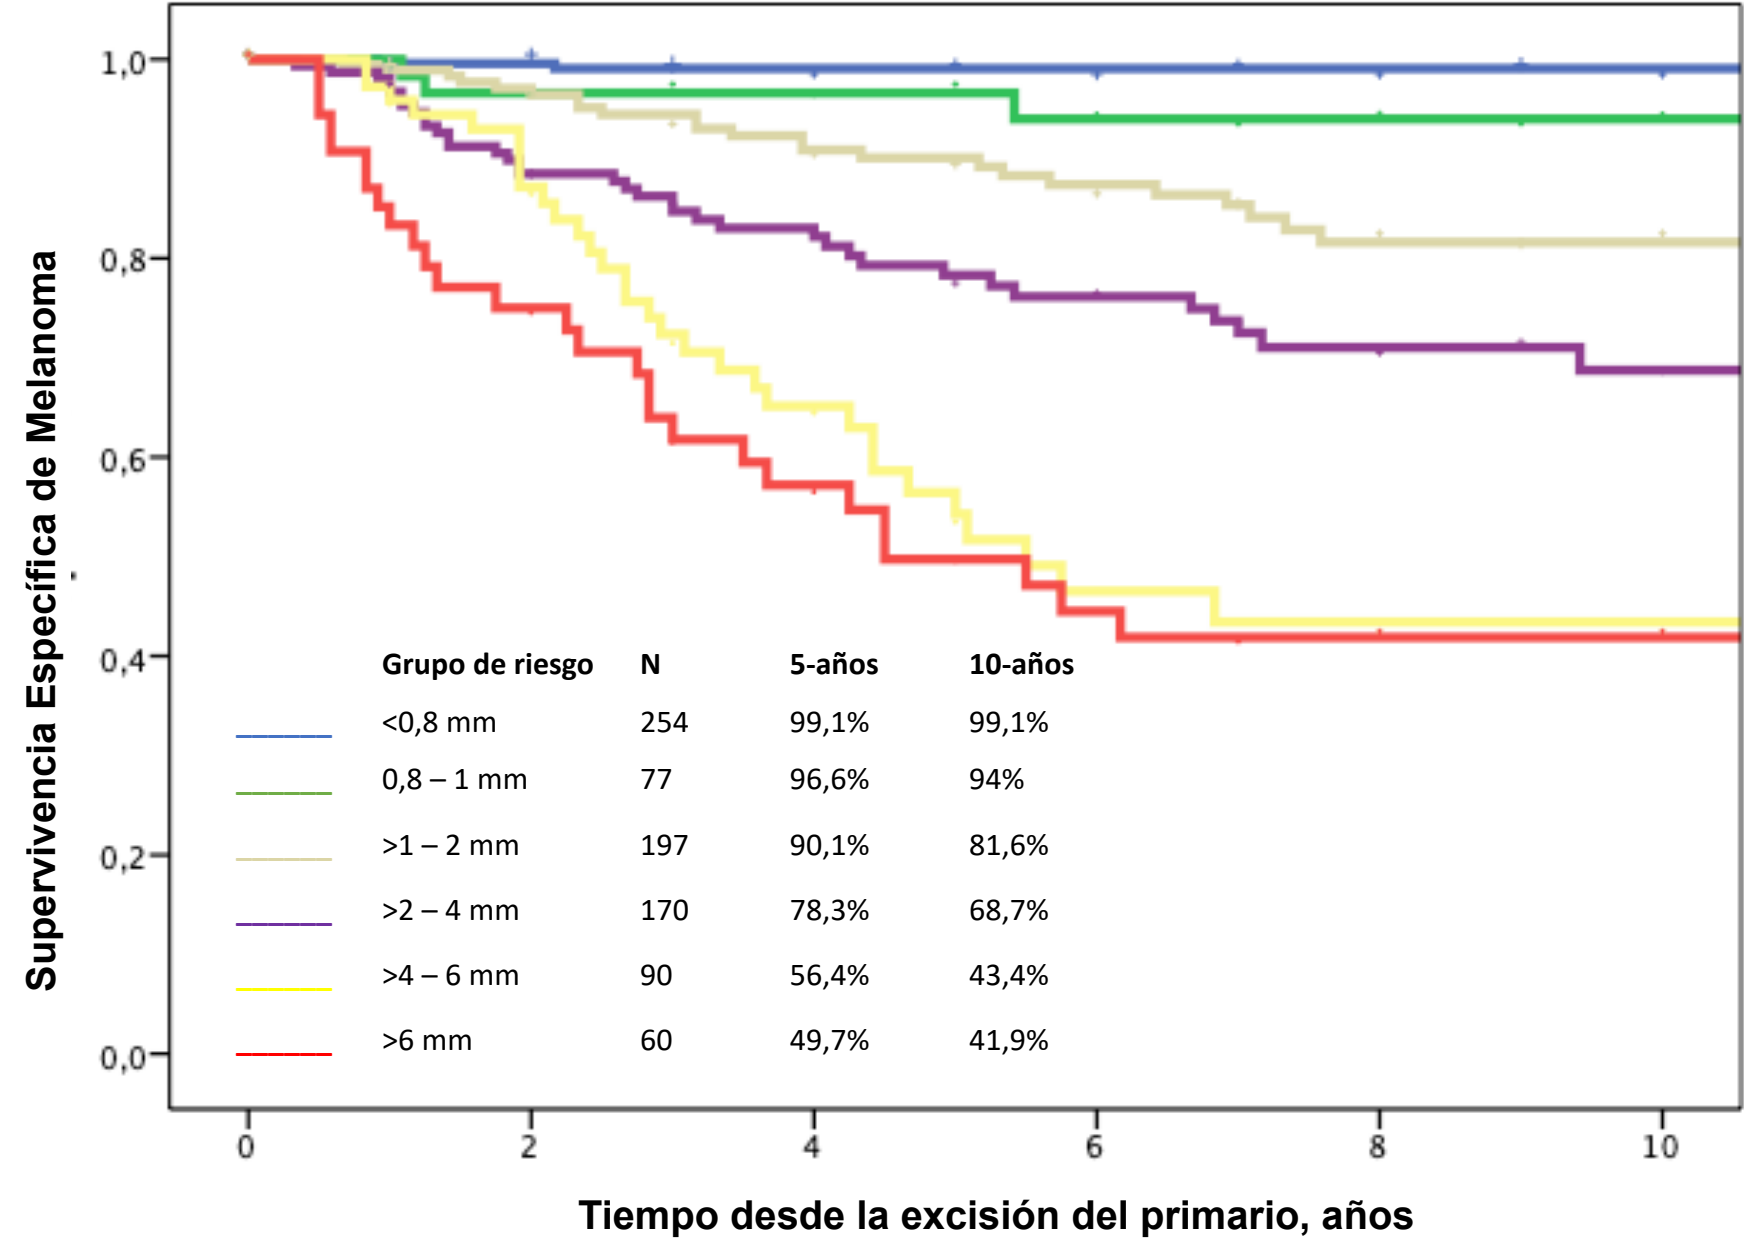

**Figura 8 suplementaria.**  
**Mujeres**

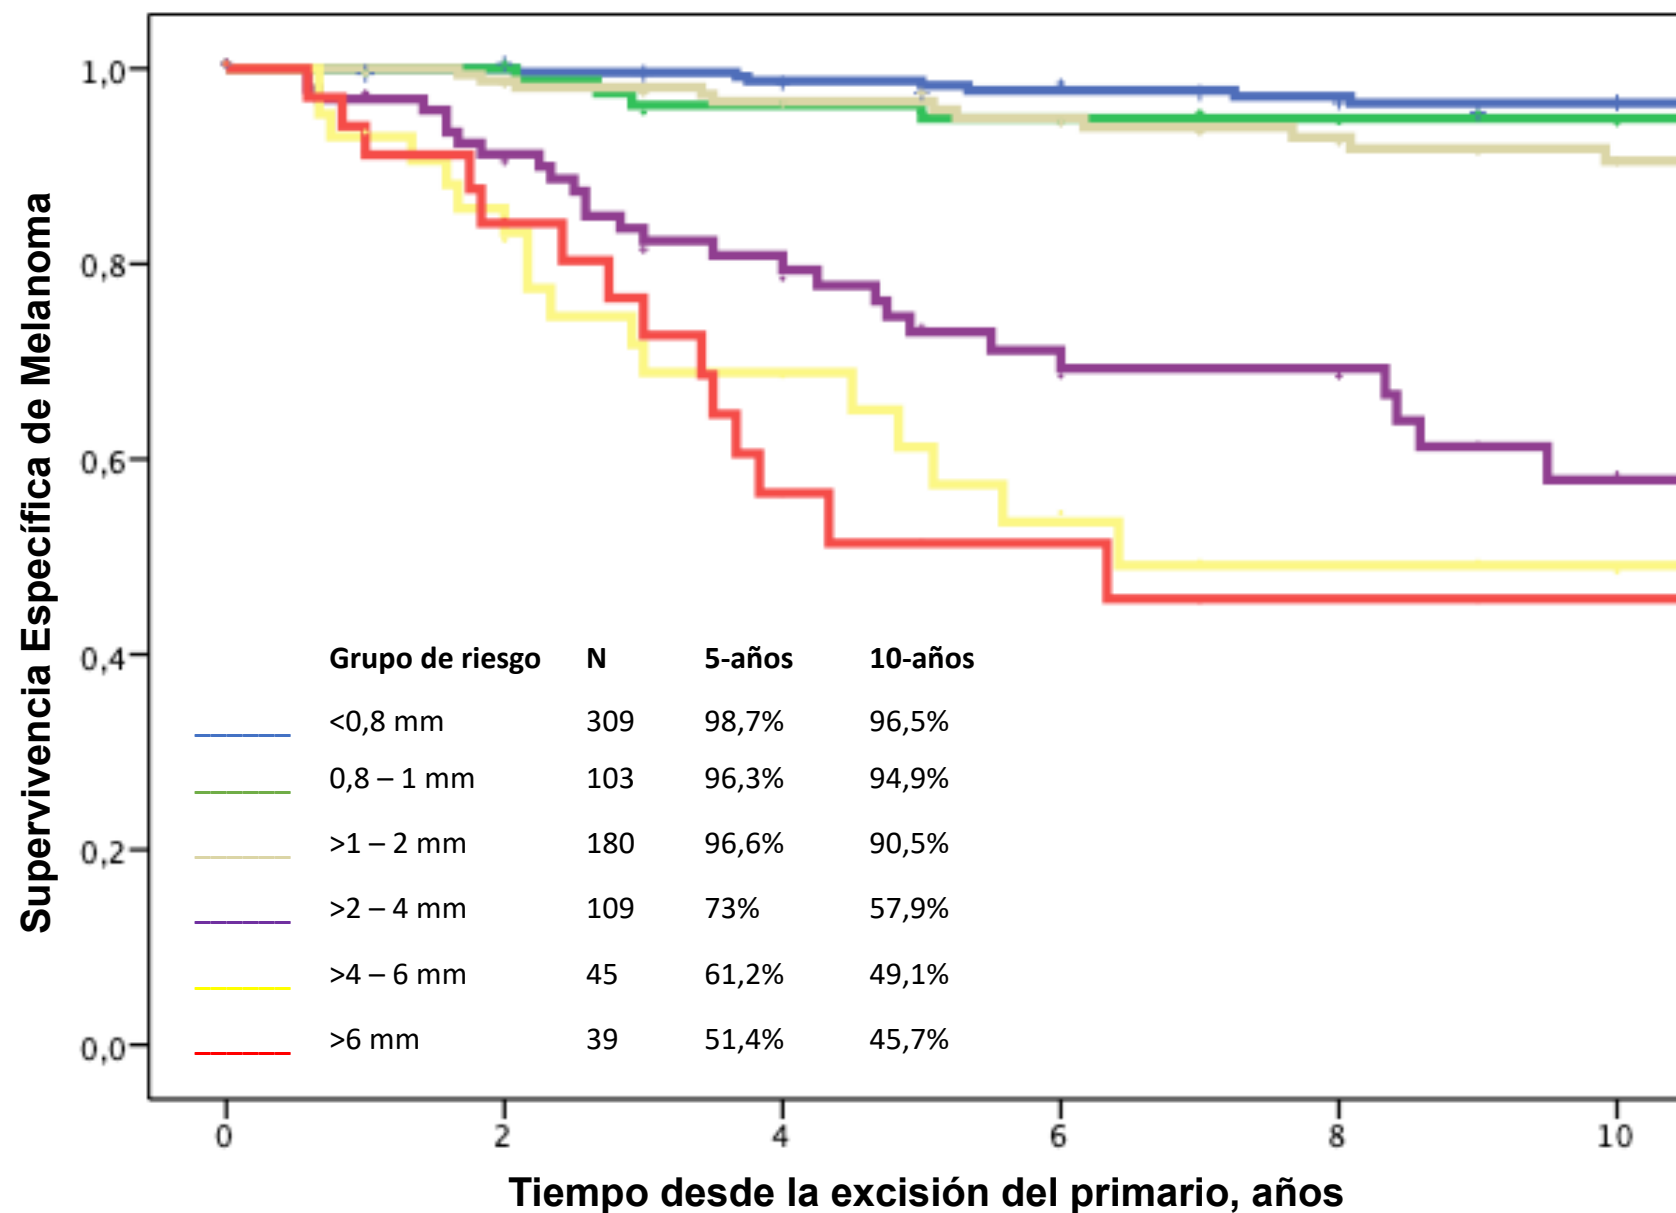

**Figura 9 suplementaria.**  
**Edad  $\geq 70$**

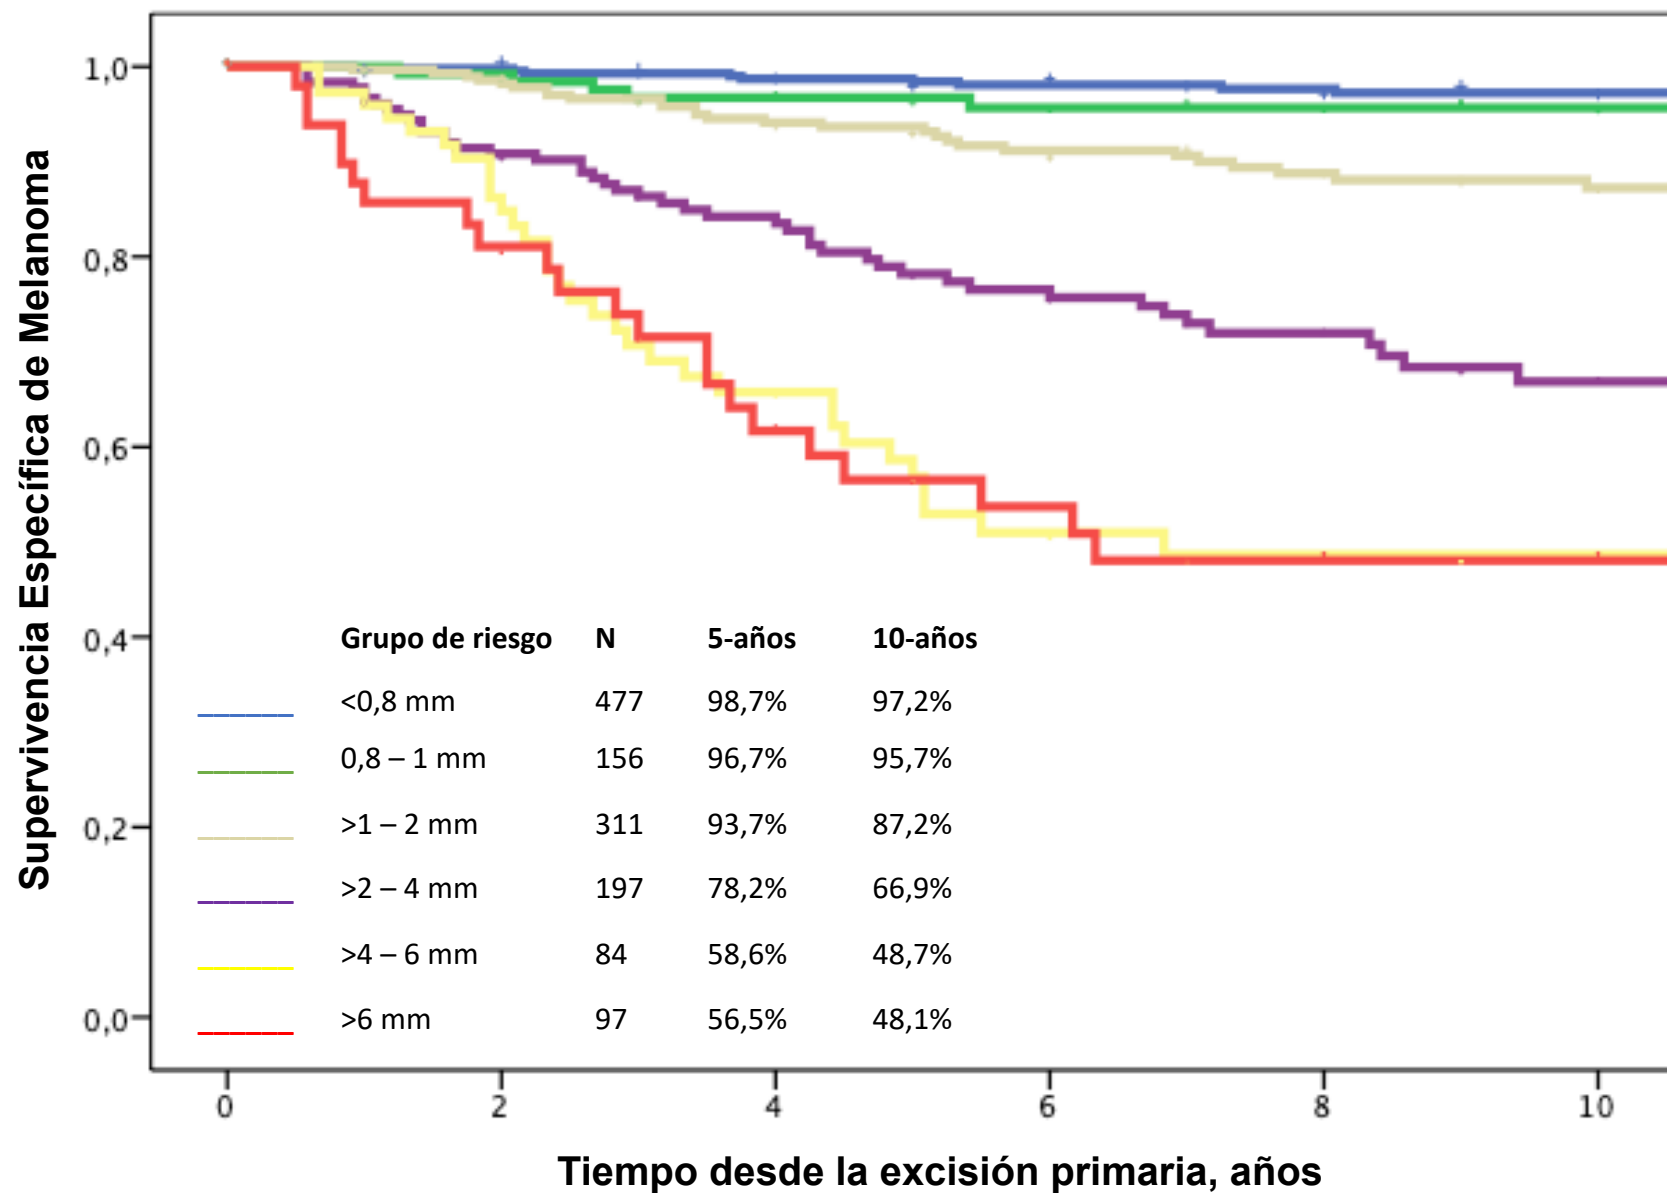

Figura 10  
suplementaria.  
Edad >70

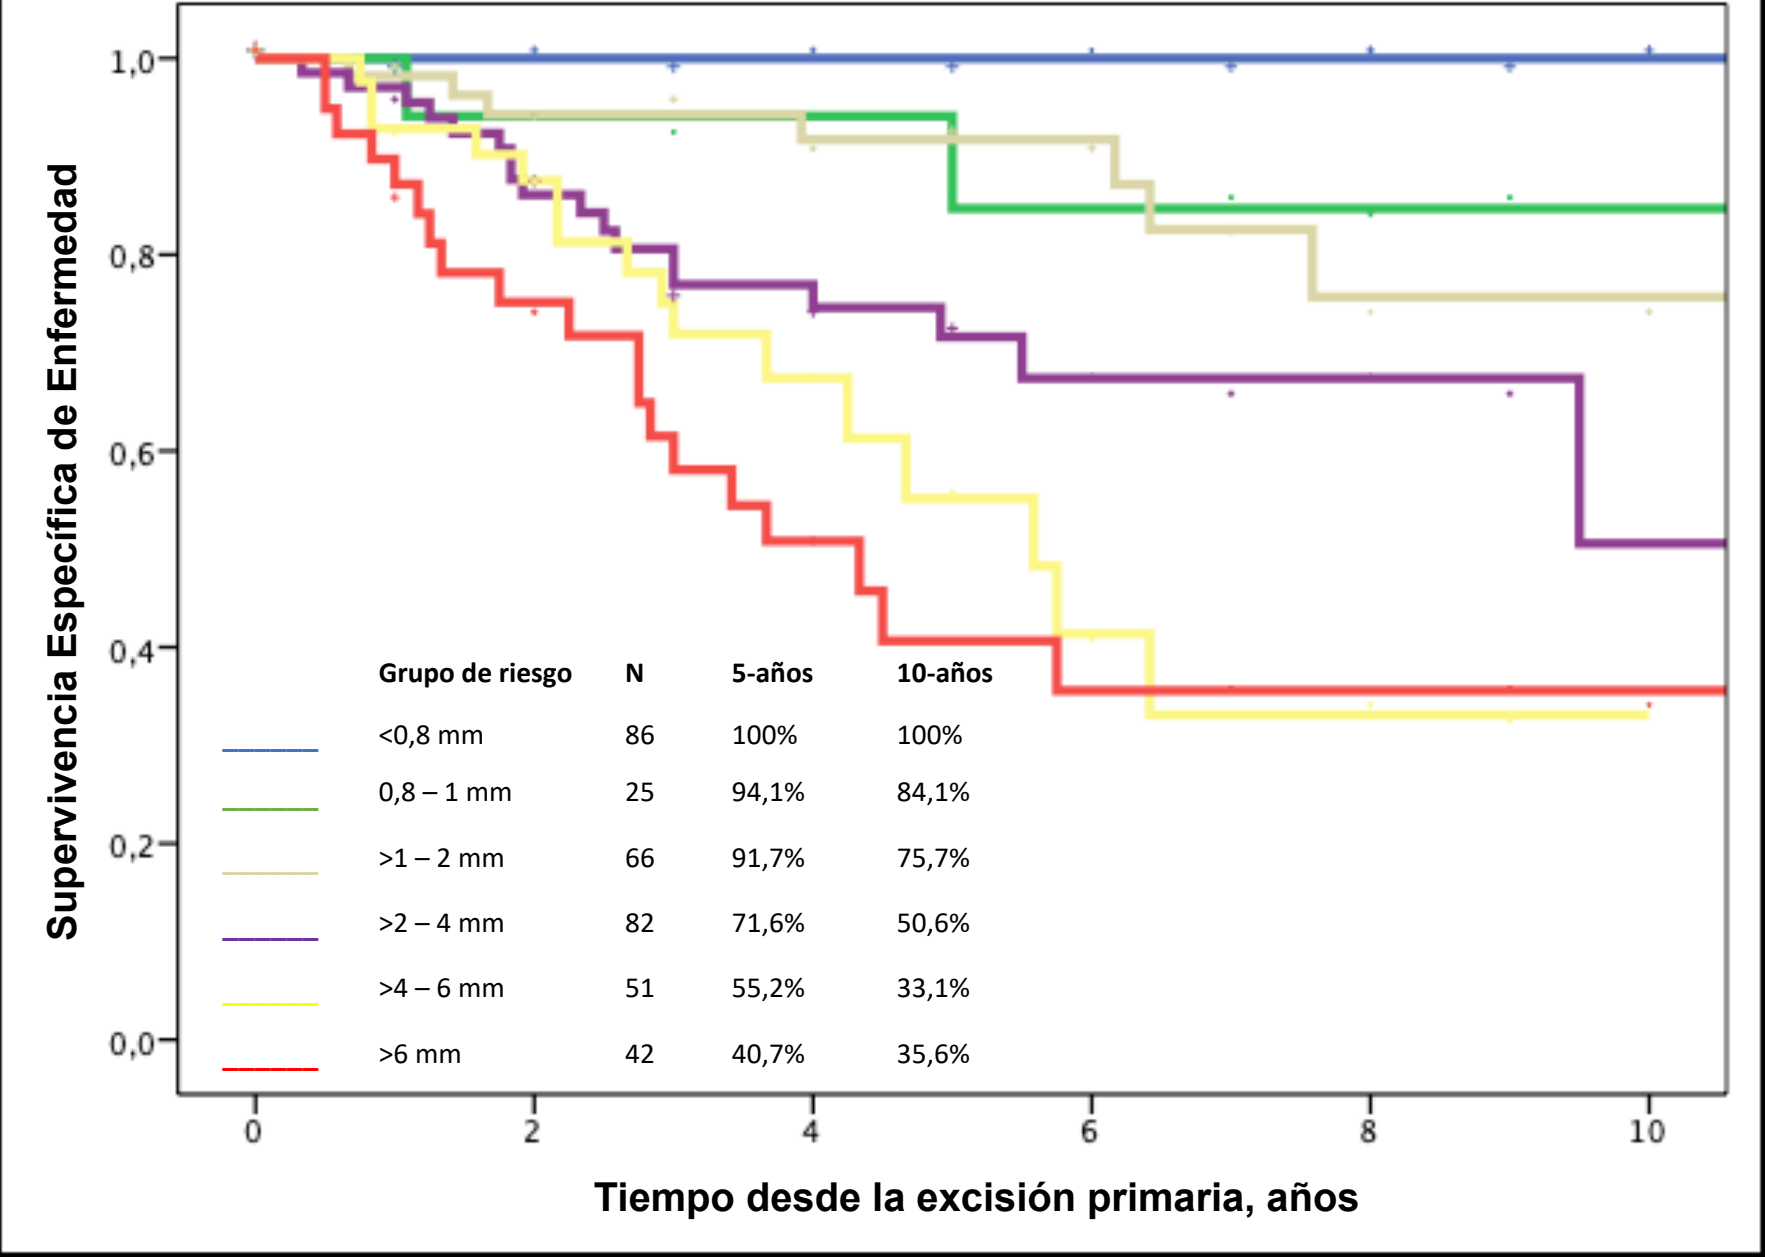

Supplement: mmc1.pdf [file mmc1.pdf]
